# Supplementary material for: Optimization and Application of CRISPR/Cas9 Genome Editing in a Cosmopolitan Pest, Diamondback Moth
Source: MDPI journal article supplement (doi:10.3390/ijms232113042), 2022-10-27
Supplement: s1 [file s1]

Table S1. Primers for amplification of potential promoters of endogenous genes in DBM.

| potential promoters | location                 | Actual length/length in the genome sequence file | Forward primer (5'→3')                      | Reverse primer (5' →3')                 |
|---------------------|--------------------------|--------------------------------------------------|---------------------------------------------|-----------------------------------------|
| 515-1               | Upstream of Px02C00515   | 1131/1131                                        | TTCAAGTAAGAATAACCAAATACATACCCTTCT           | TGCCTAGTTCCTATGCGTGAT                   |
| 515-2               | Downstream of Px02C00515 | 399/3000                                         | GGGTGTGGTGCGGTTTCCTTG                       | ATTCCCAACGTGGTGATCCGTCAAAAG             |
| 303                 | Upstream of Px05C00303   | 877/1008                                         | TTCGCACACTTTGTATCACTTCAC                    | TATAAATAAGAAATAAATGTGAGAGGTCATCAAAT     |
| 656-1               | Upstream of Px07C00656   | 676/640                                          | CCAAACAGACTGTAAAACTGTG                      | ATTATAATTTTATTTATAGGTACTGATTTTACTGTTATT |
| 656-2               | Downstream of Px07C00656 | 417/1316                                         | TTGGATTGTTCTAATAGCTCGCTAC                   | TCATTTTAGCCCTAAGATTTTTTACTC             |
| 217                 | Upstream of Px18C00217   | 1702/1702                                        | ATTTATTTTTTAATTAGGATAATTAATTAGTTTTTAT TCCTG | CTTGATCTGTAACAATGGAATAAAAATGTTAAT       |
| 336-1               | Upstream of Px18C00336   | 1600/1600                                        | ATGTTAAATACCGCGTCAGGAAC                     | ATACAACGTTTGAATCACATTACCAC              |
| 336-2               | Downstream of Px18C00336 | 1607/1607                                        | CCACCTCGCAGACGCAGC                          | CTTCGAGCCGCAACACAC                      |

Table S2. Primers for amplification of the 217 promoter.

| Truncated promoter | The truncated length/Total length | Forward primer (5'→3')   | Reverse primer (5'→3')            |
|--------------------|-----------------------------------|--------------------------|-----------------------------------|
| 217-1              | 1462/1702                         | ATTGGTAAATACCCAGTCTGAGTG | CTTGATCTGTAACAATGGAATAAAAATGTTAAT |
| 217-2              | 1267/1702                         | CGGTACCTATCTCTCAAGGCAC   | CTTGATCTGTAACAATGGAATAAAAATGTTAAT |
| 217-3              | 1079/1702                         | CTGGCTGTACTATGTACTCTGTG  | CTTGATCTGTAACAATGGAATAAAAATGTTAAT |
| 217-4              | 850/1702                          | AACGCATCGCATAGTAAACTCAC  | CTTGATCTGTAACAATGGAATAAAAATGTTAAT |
| 217-5              | 671/1702                          | GAGAACTGCGCAGTGCAG       | CTTGATCTGTAACAATGGAATAAAAATGTTAAT |
| 217-6              | 477/1702                          | CTCTACAATAGGTGTGGCAAGG   | CTTGATCTGTAACAATGGAATAAAAATGTTAAT |
| 217-7              | 263/1702                          | ATGTTTCAGTGACGTTCTTAGG   | CTTGATCTGTAACAATGGAATAAAAATGTTAAT |

Table S3. Primers for construction of pGL3 plasmid with endogenous promoters.

| Primer                                                   | Sequence (5'→3')       |
|----------------------------------------------------------|------------------------|
| pGL3-Basic-reverse amplification-F                       | TTGGCATTCCGGTACTGTTGGT |
| pGL3-Basic-reverse amplification-R                       | ACTTAGATCGCAGATCTCGAG  |
| Homology arm added to endogenous promoter forward primer | ATCTGCGATCTAAGT        |
| Homology arm added to endogenous promoter reverse primer | GTACCGGAATGCCAA        |

Table S4. Primers for construction of pB-EGFP plasmid with different promoters.

| Primer                                                   | Sequence (5'→3')            |
|----------------------------------------------------------|-----------------------------|
| pB-EGFP-reverse amplification-F1                         | ATGGTGAGCAAGGGCGAGGAG       |
| pB-EGFP-reverse amplification-R2                         | AGATCTTAATACGACTCACTATAGGGC |
| Homology arm added to endogenous promoter forward primer | TGAGTCGTATTAAGATCT          |
| Homology arm added to endogenous promoter reverse primer | TCGCCCTTGCTCACCAT           |

Table S5. Primers for construction of pB-Neo-EGFP plasmid.

| Primer                               | Sequence (5'→3')                                                              |
|--------------------------------------|-------------------------------------------------------------------------------|
| Neo-F                                | ATGATTGAACAAGATGGATTGCACGCAG                                                  |
| Neo-R(HA)                            | <u>ACCGCATGTTAGAAGACTT</u> CCTCTGCCCTCGAAGAACTC<br>GTCAAGAAGGCGATAGAAG        |
| pB-EGFP-reverse amplification-F2(HA) | <u>CTTCTAACATGCGGT</u> GACGTGGAGGAGAATCCCGGCCC<br>TATGGTGAGCAAGGGCGAGGAGCTGTT |
| pB-EGFP-reverse amplification-R2     | AGATCTTAATACGACTCACTATAGGGC                                                   |
| IE1-F(HA)                            | <u>TCTTGTTATAGATATCCGATGTCTTTGTGATGCGCGCGA</u><br>CATTTT                      |
| IE1-R(HA)                            | <u>CATCTTGTTCAATCATCTTGGTTGTTACGATCTTGTCGC</u>                                |

The underlined part in the table indicates the homology arm added to the primer.

Table S6. Primers for construction of pB-Cas9-Neo plasmid.

| Primer                         | Sequence (5'→3')                                         |
|--------------------------------|----------------------------------------------------------|
| pB-Neo-reverse amplification-F | ACGCGAGTTAATTAAGACCCGGGCTGCAGG                           |
| pB-Neo-reverse amplification-F | AGATCTTAATACGACTCACTATAGGGCGAATTGG                       |
| Cas9-F(HA)                     | <u>CCATTGTTACAGATCAAGATGGACAAGAAGTACTC</u><br>CATTGGGCT  |
| Cas9-R                         | TCACACCTTCCTCTTCTTCTTGG                                  |
| 217-2-F(HA)                    | <u>ATAGTGAGTCGTATTAAGATCT</u> CGGTACCTATCTCT<br>CAAGGCAC |
| 217-2-R                        | CTTGATCTGTAACAATGGAATAAAAATGTTAAT                        |
| SV40-F(HA)                     | <u>AGAAGAAGAGGAAGGTGTGAGATCCACCGGATCTA</u><br>GATAACTG   |
| SV40-R(HA)                     | TCTTAATTAACTCGCGTTAAGATACAT                              |
| pB-Cas9-detection-F            | ATGGACAAGAAGTACTCCATTGGGCTC                              |
| pB-Cas9-detection-R1           | TCACACCTTCCTCTTCTTCTTGGGGTCAGCCC                         |
| pB-Cas9-detection-R2           | CCACTACGTGAACCATCACCTAATC                                |

The underlined part in the table indicates the homology arm added to the primer.

Table S7. Primers for construction of pU6-shRNA (EGFP) plasmid and RT-qPCR.

| Primer         | Sequence (5'→3')                  |
|----------------|-----------------------------------|
| Oligo-shEGFP-1 | TAGTGTAACAACAGCCACAAGTGTGCTG      |
| Oligo-shEGFP-2 | AGGACAGCACACTTGTGGCTGTTGTAGTTGTAC |
| Oligo-shEGFP-3 | TCCTTGTGGCTGTTGTAGTTGTACTTTT      |
| Oligo-shEGFP-4 | AAACAAAAAGTACAACAGCCACA           |
| EGFP(qPCR)-F   | GAACCGCATCGAGCTGAAGG              |
| EGFP(qPCR)-R   | CTGCCGTCCTCGATGTTGTG              |
| RPL32(qPCR)-F  | CAATCAGGCCAATTTACCGC              |
| RPL32(qPCR)-R  | CTGGGTTTACGCCAGTTACG              |

Table S8. Primers for construction of pU6-gRNA plasmid and amplification assays.

| Primer              | Sequence (5'→3')         |
|---------------------|--------------------------|
| Oligo-sgRNA(EGFP)-1 | TAGTGGCGAGGGCGATGCCACCTA |
| Oligo-sgRNA(EGFP)-2 | AACTAGGTGGCATCGCCCTCGCC  |
| Oligo-sgRNA1(Ubx)-1 | TAGTGGTGGTGGCGAGCAGCAGAA |
| Oligo-sgRNA1(Ubx)-2 | AACTTCTGCTGCTCGCCACCACC  |
| Oligo-sgRNA2(Ubx)-1 | TAGTGGATTGCGCTTACGACGCGT |
| Oligo-sgRNA2(Ubx)-2 | AAACACGCGTCGTAAGGCGAATCC |
| pU6-detection-R     | TCACCAGCGTTTCTGGGTGAG    |
| Ubx-detection-F     | CGGGGACCAGTACCGGGGGTTC   |
| Ubx-detection-R     | AGAGGAAGAAATCATGGGCTG    |

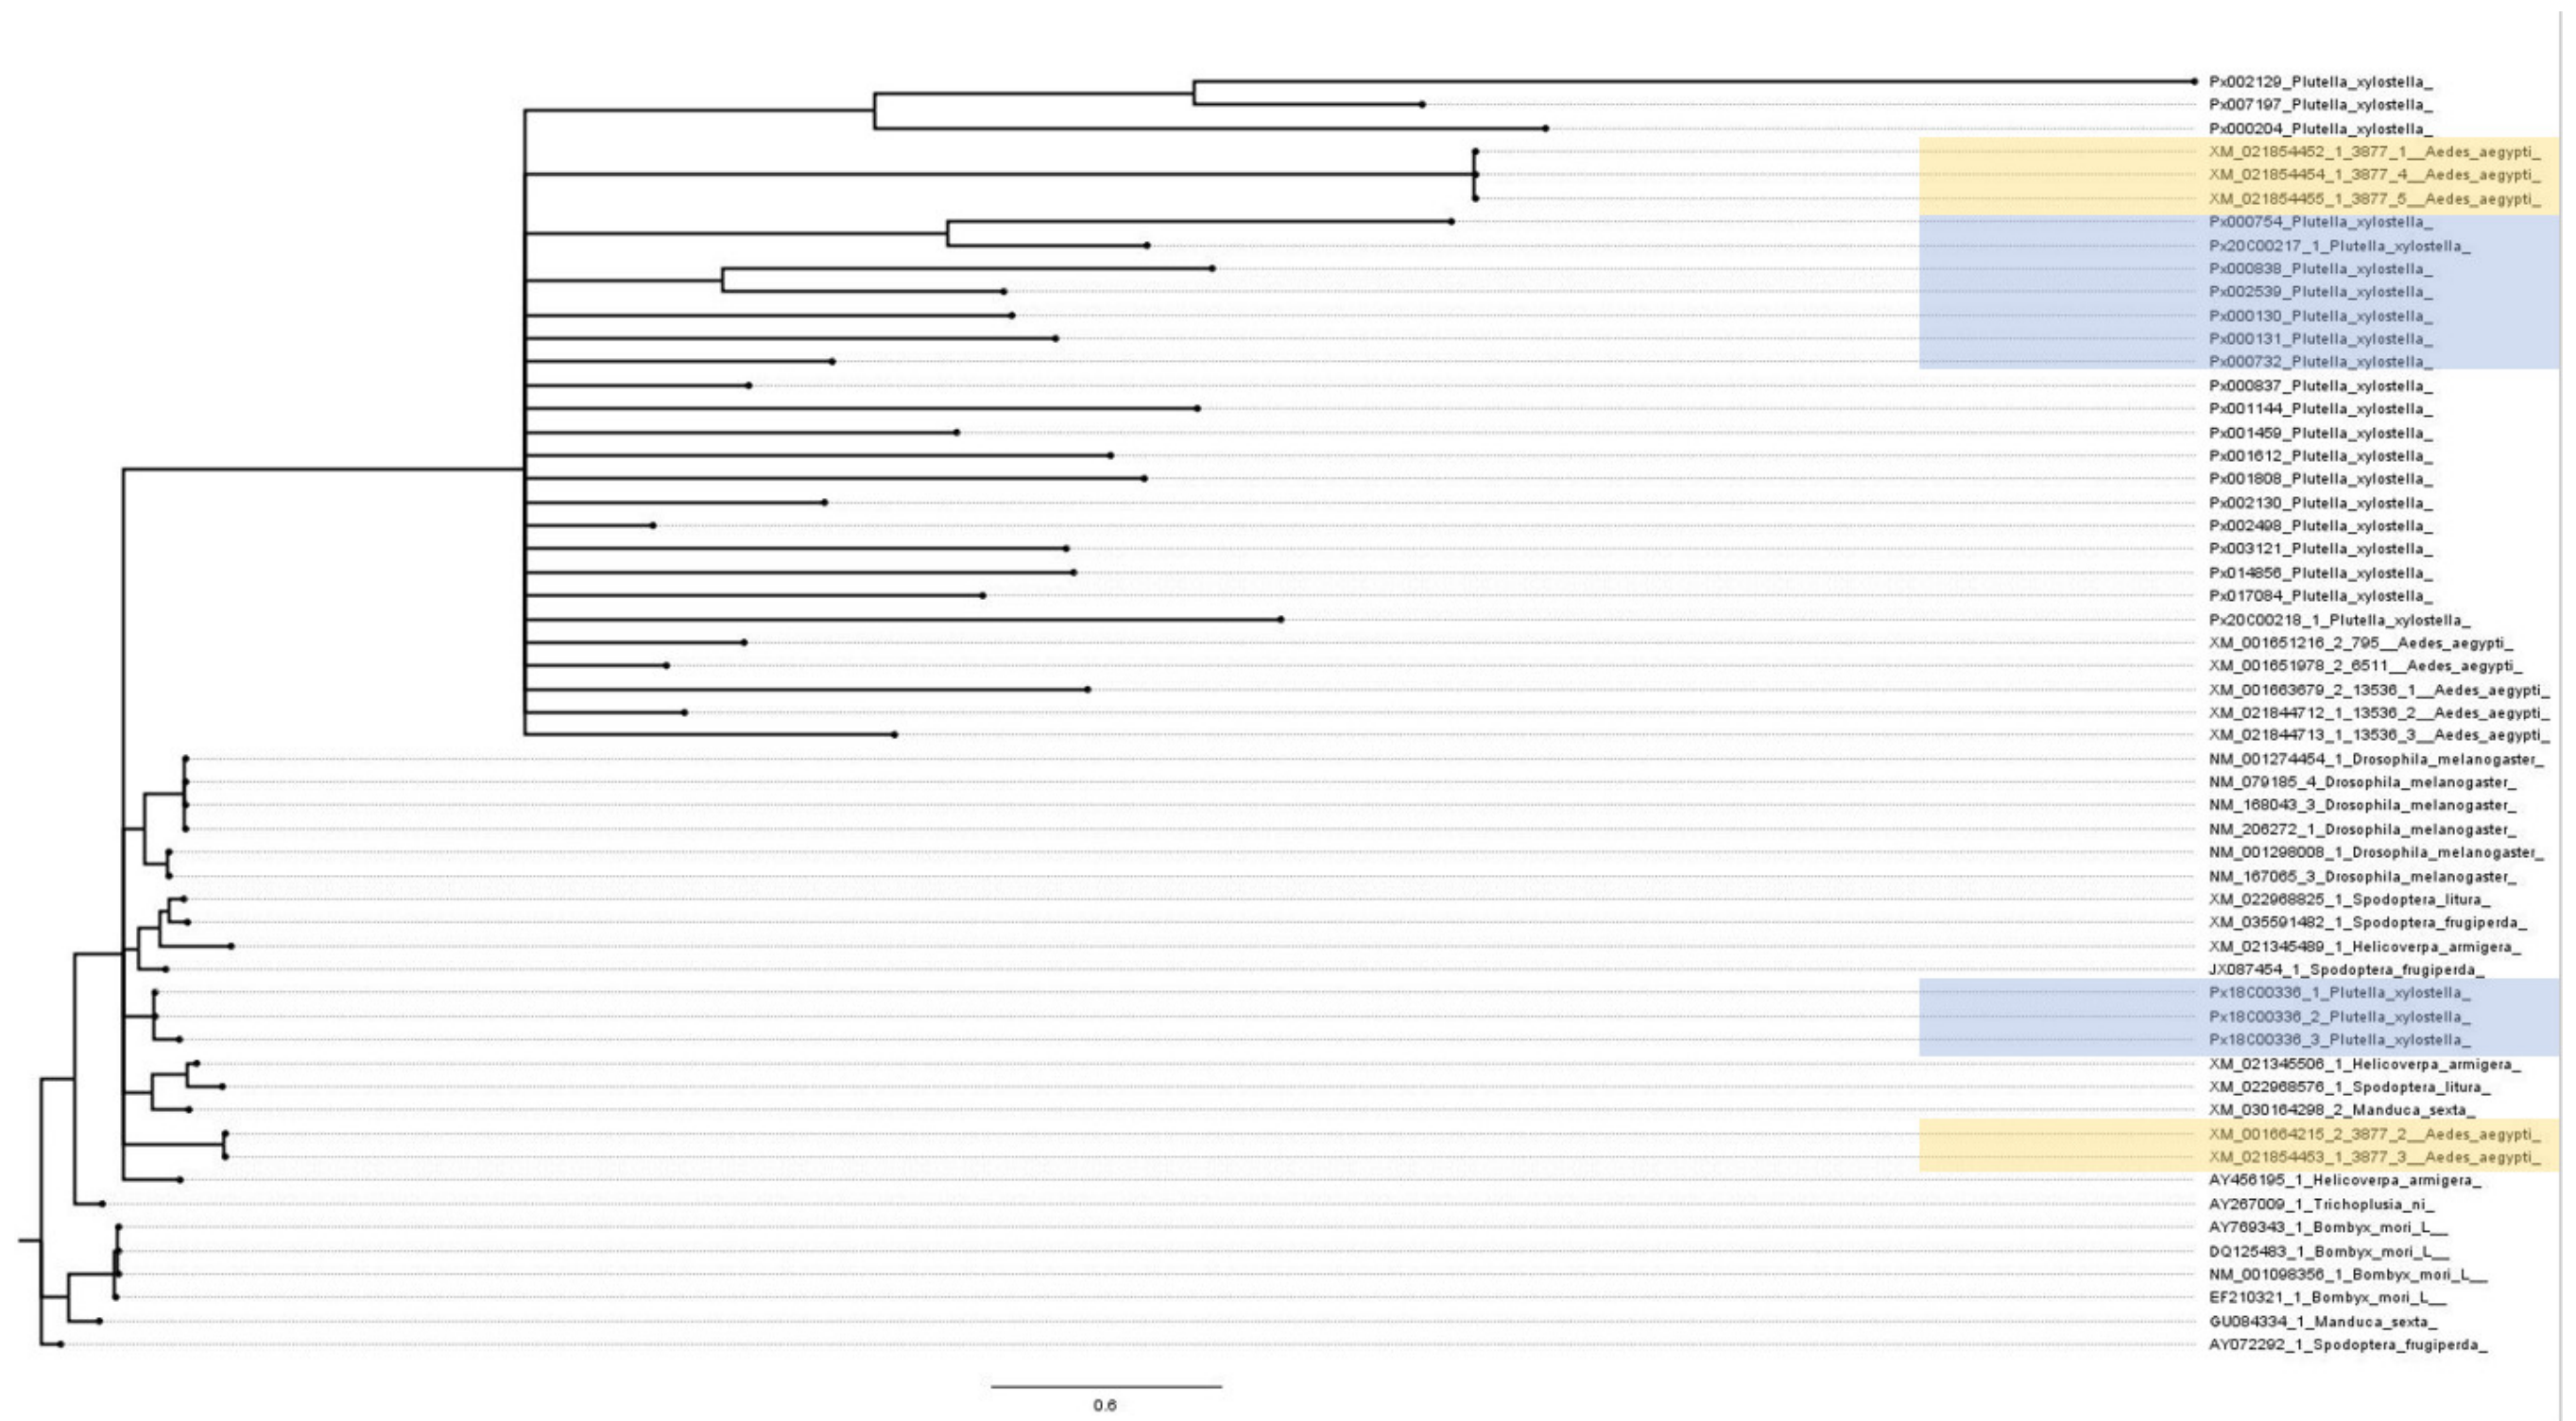

**Figure S1.** A phylogenetic tree of *polyubiquitin (Pub)* genes from different species. The corresponding tree scale is provided in the figure. The region covered in orange is the *Pub* gene with a strong promoter identified in *Aedes aegypti*. The blue area is the selected *Plutella xylostella* endogenous gene with a strong promoter.

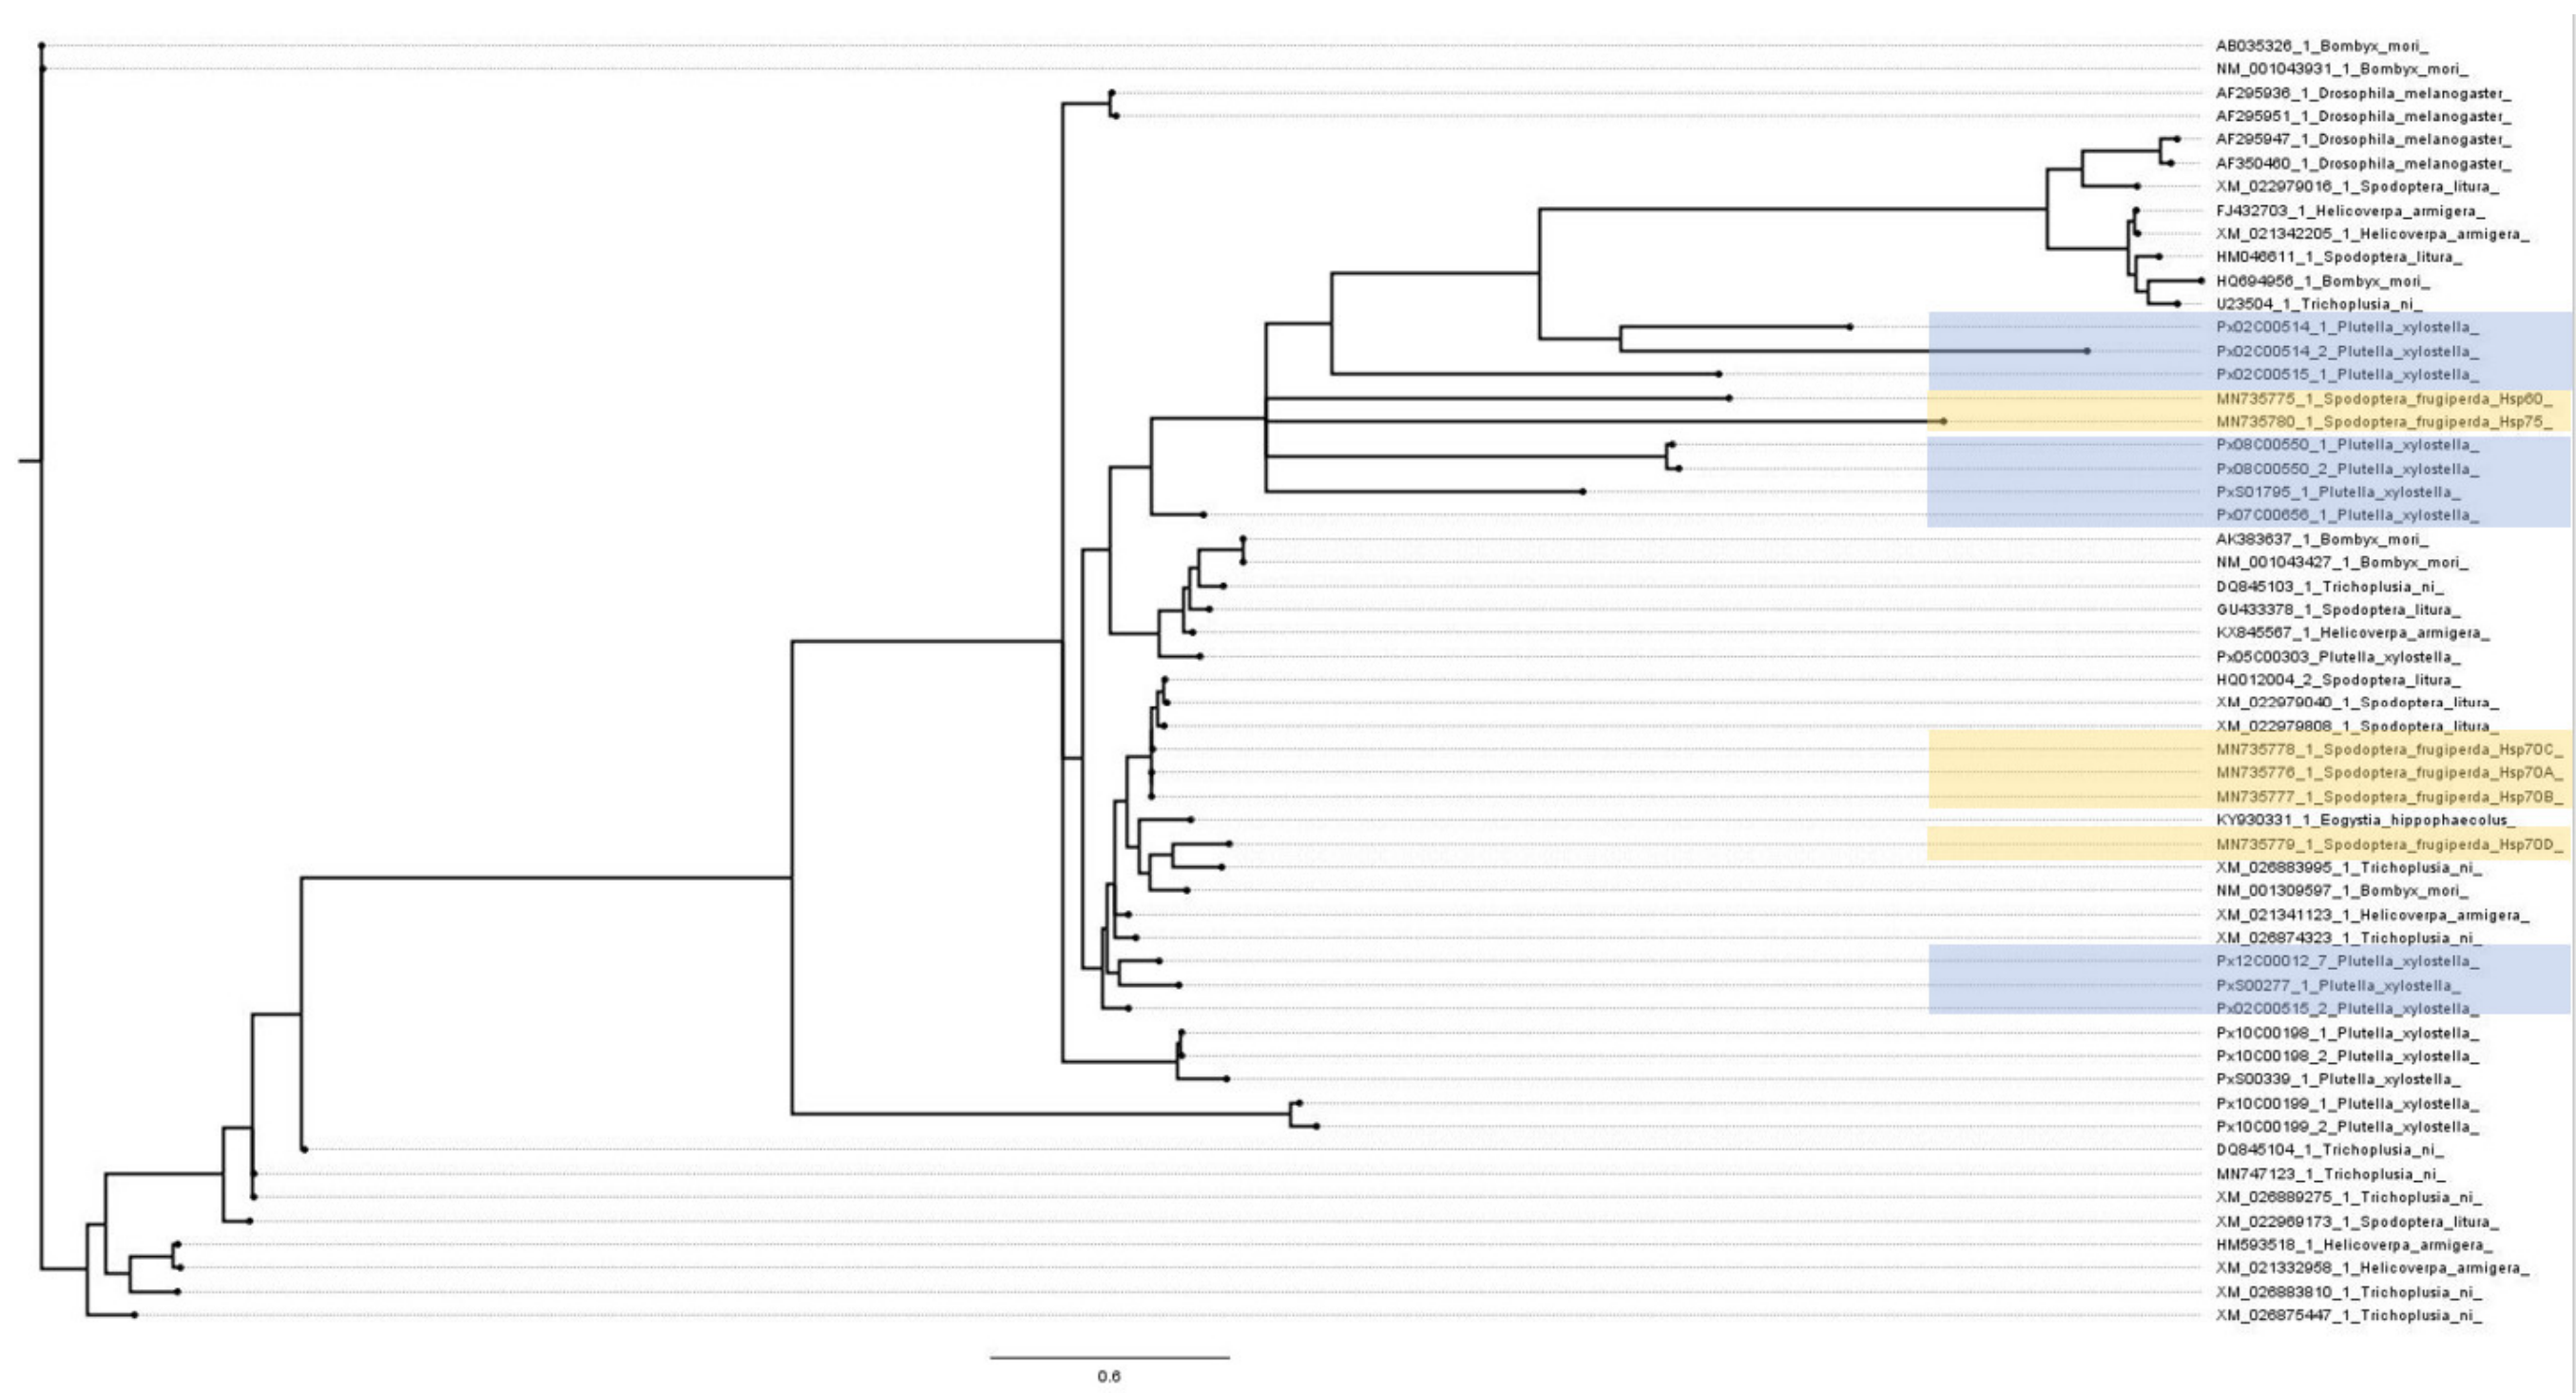

**Figure S2.** A phylogenetic tree of heat shock protein 70 (*Hsp70*) genes from different species. The corresponding tree scale is provided in the figure. The region covered in orange is the *HSP70* gene with a strong promoter identified in *Spodoptera frugiperda*. The blue area is the selected *P. xylostella* endogenous gene with a strong promoter.



-1287 CGGTACCTATCTCTCAAGGCACAGTCTAGTTTAAATAAATCAGCTAGACAGACAGATAGATCTTCGCCCCCATTTGTATAA  
 Sp1  
 -1187 GCCATTTTTATTTAGGAAGG AAGATATAAATT AAGAAAATGTACAATGTTCTGTTGGTTCGTGCGAACAGCGATGTTATTA  
 C/EBPalp TBP  
 -1107 TTCTGAGATCACGAATTACCAACATTCAGCTGGCTGACTATGTACTCTGTGATCATGAGTTTGCACCTCTTTGCTCTCAAG  
 v-Myb C/EBPalp  
 -1027 ACATGACGCATGCGTTACTAGAAAAATCAAAAATAATCTGCTGTCTCTTTTCGTTTGTGCTAAGTGTAAAAAGGAGACGGAT  
 C/EBPalp TBP  
 -947 AAACAACGGCACC AATCAAAACACAGTATTGATTGAAGTTGCAAGTCTATATAAAGCGAGGCAACTATTTCTTGACGCAT  
 C/EBPbeta TBP  
 -867 TTCAAAGTGAAAAATTAACGCATCGCATAGTAACTCACTGTTGTGTTGAAGATTTTTATTGTACAGAACAGACATT  
 HNF-3  
 -787 TCCTTGATAAATTATAGTGAATATTGGTAAGTTCCTTTCCATTCTAACTACTCATAATACACCATACTTAAATTAGGC  
 C/EBPalpha  
 -707 TGAATCTCAAACAAACTACATTTCTTTCGCTGGCTGAGAACTGCGCAGTGCAGCGCATTTTCATTGATTTCTTTTCCTT  
 E1  
 -627 TGTCCGCATCTTAATCATCTTGCTGGAAAAATAAATTGAATCACACCATCGTTTATGCCCTCATCAAGGATTGAATAAAC  
 C/EBPalpha Sp1  
 -547 ACAATTTATTGTGAAATGTTATTGATGATAAACCAACTTAGATTCTCGGATTTTATATAAATTGCAAAACTCTACAATA  
 TBP  
 -467 GGTGTGGCAAGGTTAATAAACAAGCAATTTACTGCAGAATTTTCTAAATATTGTAGCTTGCCTAACCTCGTTTTGGTTT  
 GCBox NF-1  
 -387 GTGGATCATCTTGGGTTTATTCATATATAGGTATTACTTACTACCTACGTAGTTACAGCAGTACCACCTATCAAGTA  
 GATA-1  
 -307 ACCCAGAAGAAATATAGGTATAAA TAGGTACCTATAA CAATATTATGTTCAAGTGTACGTTCTTAGGTTATCTAAAGTAG  
 CDC5 Evi-1 TBP  
 -227 GTTTTTAGGTCATTGATTTGAATAGTTCCTTGACCTGTGCAAACTCCGTTTGCTCAGCGCCATTATTATGACGCAGA  
 GAATbox  
 -147 CATGTTATGATAGCACAA TTCAATAATATTGTGAAATCTTTATCTTTAACACTTATTGAATATAAGTAGGTATGTTACG  
 Mat1-Mc TBP  
 -67 AATAGTGTTATCATCACTTTGTTGATAAAGGGA TATTAACA TTTTATTCCATTGTTACAGATCAAGATGCAGATCTTTG  
 TATAbox +1  
 +14 TCAAGACATTGACTGGCAAGACCATCACTCTAGAGTGGAGCGCTGCTGACACCATCGAGAAATGTGAAGGCTAAGATTCAAG

**Figure S3.** Characterization of the 217-2 promoter. Potential transcriptional elements in the sequences are predicted by using Genomatix Software Suit and Alibaba 2.0 databases. The bolded sequence part is the transcriptional regulatory region of the core of the 217 promoter, and the ATG marked in red is the translation initiation site of the *Px000217* gene.
